# Supplementary material for: Mutations in NAKED-ENDOSPERM IDD genes reveal functional interactions with SCARECROW during leaf patterning in C4 grasses
Source: PubMed Central journal article supplement (PMC10138192; doi:10.1371/journal.pgen.1010715), 2023-04-17
Supplement: pgen.1010715.s010.pdf [file pgen.1010715.s010.pdf]

**A**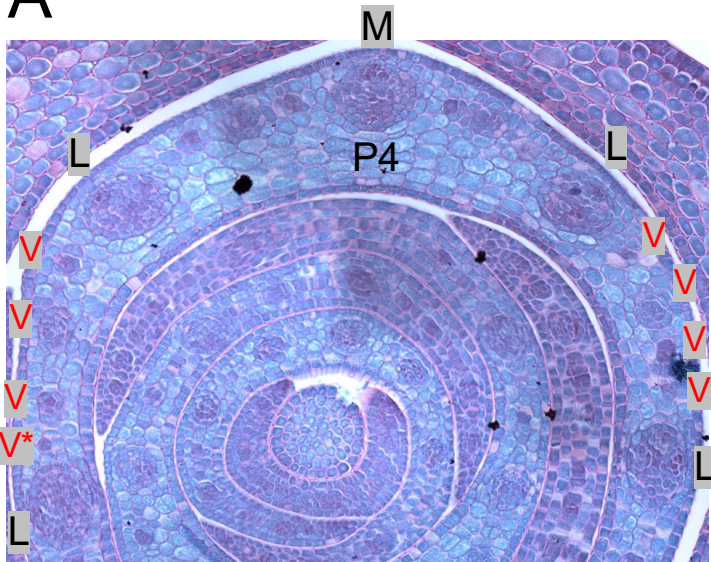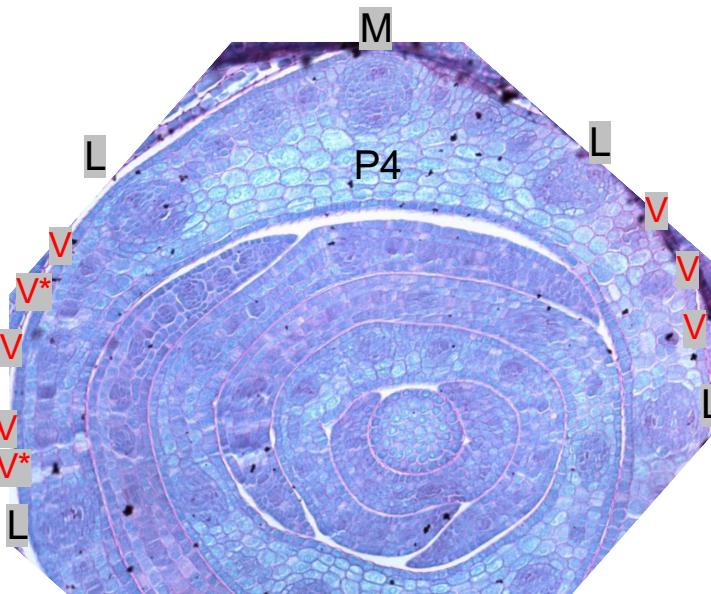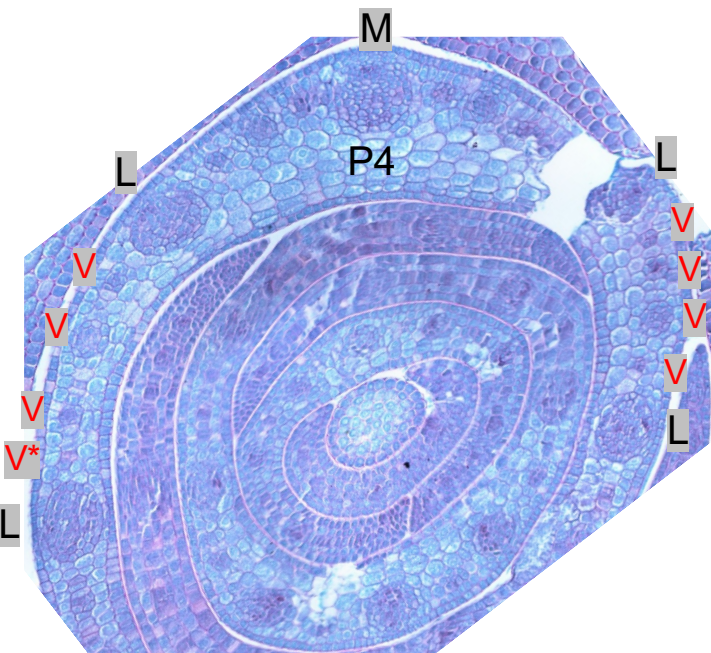

Wild-type (W22)

**B**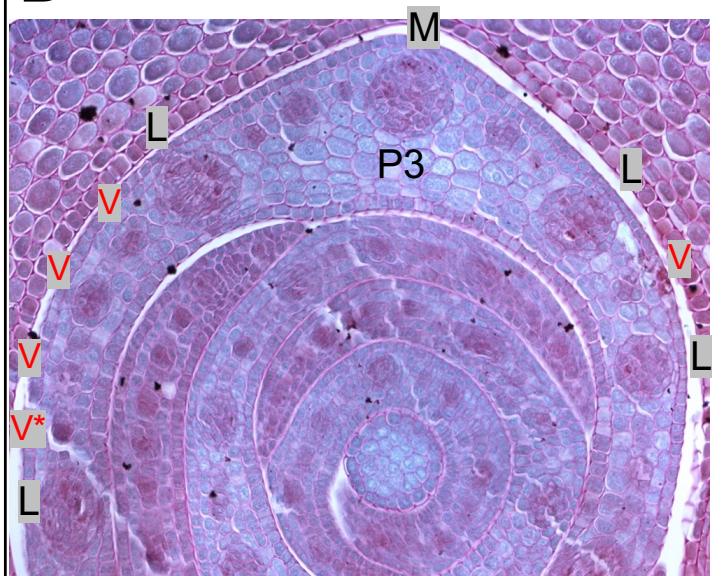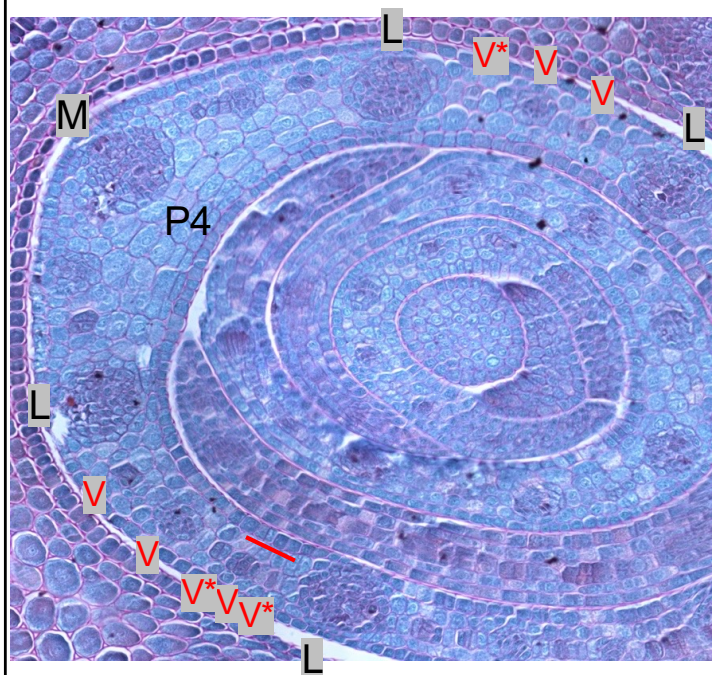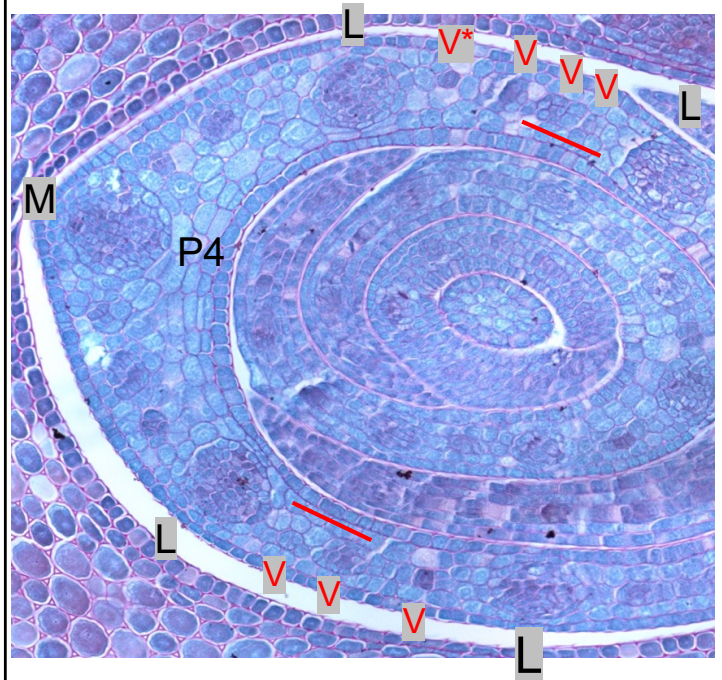*scr1;scr1h*

**C**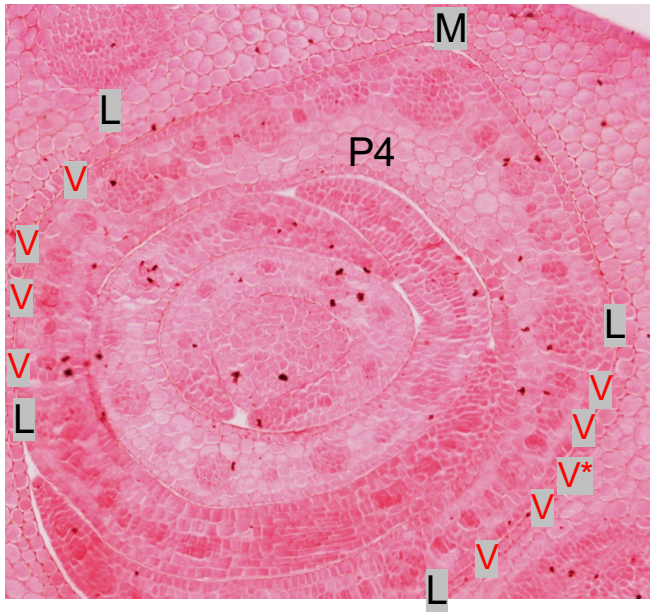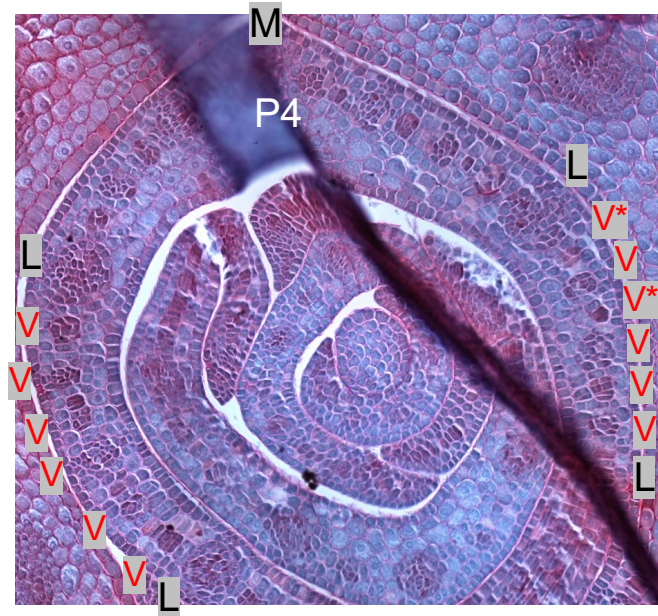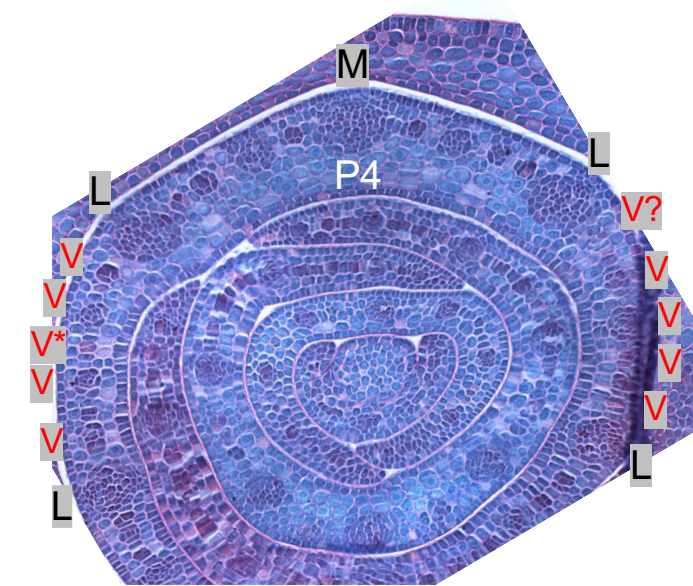*nkd1;nkd2***D**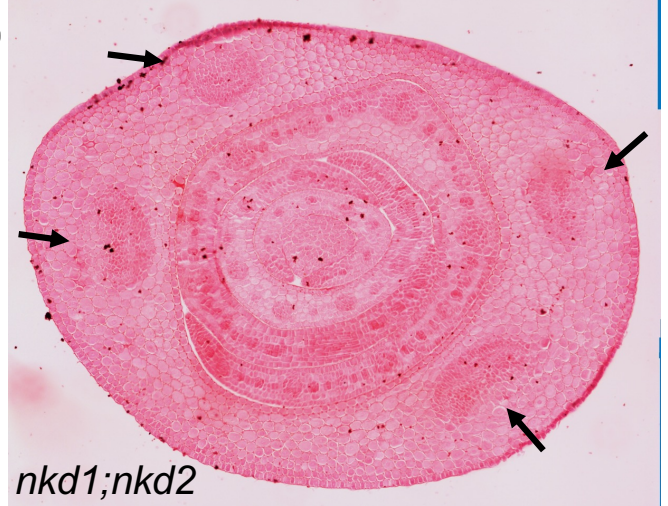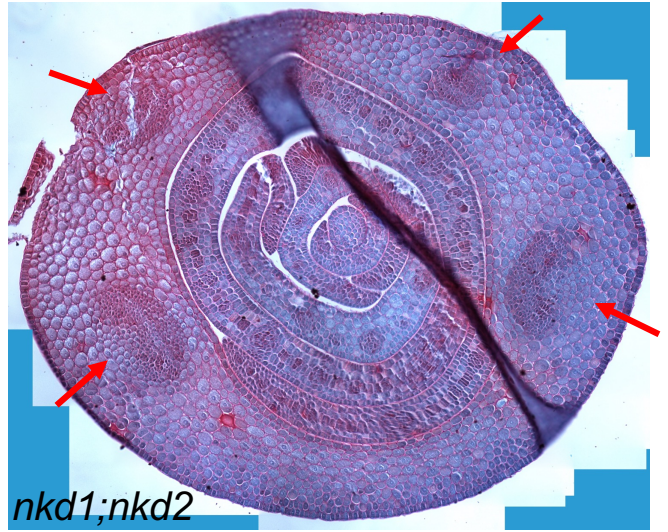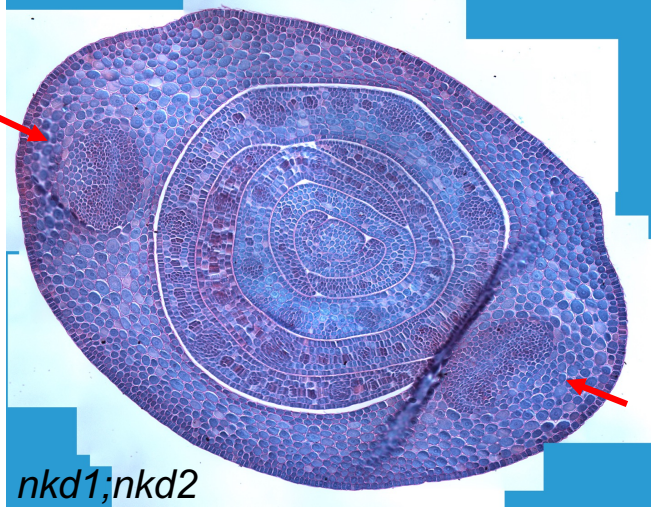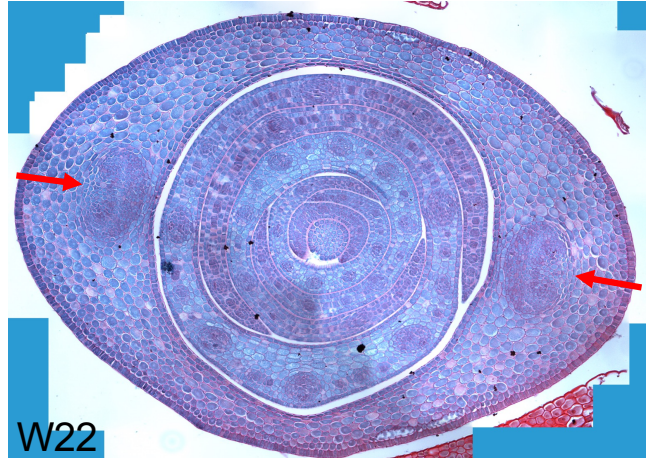

**E**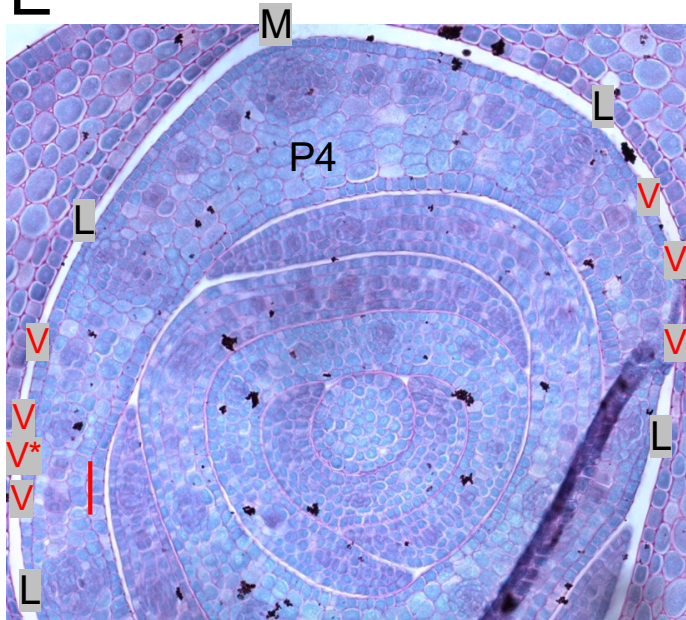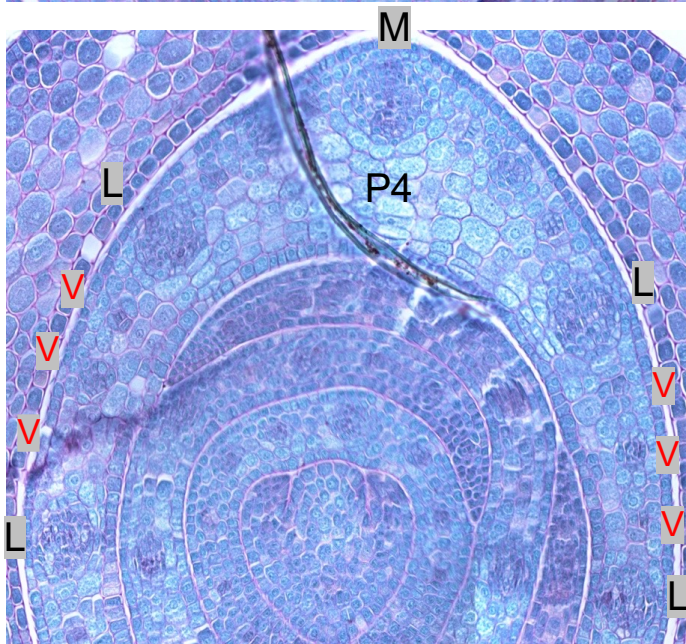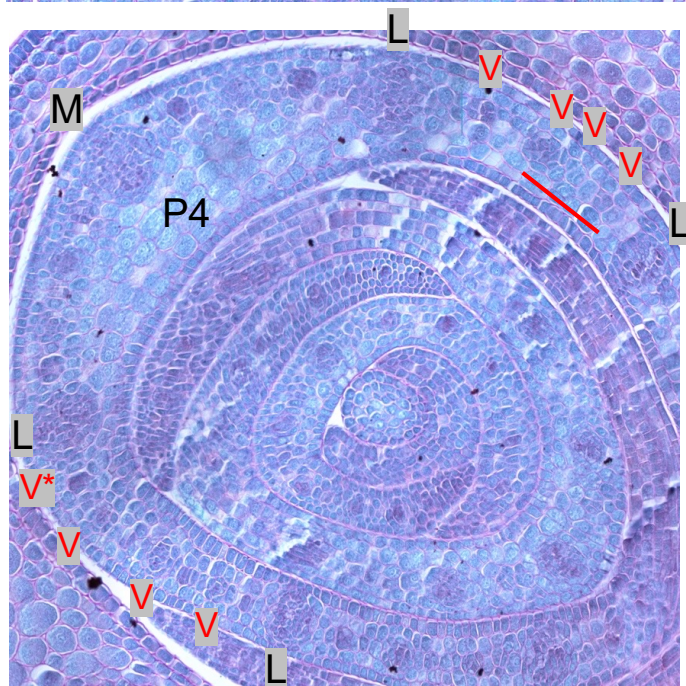*scr1;scr1h;nkd1;nkd2* (het parent)**F**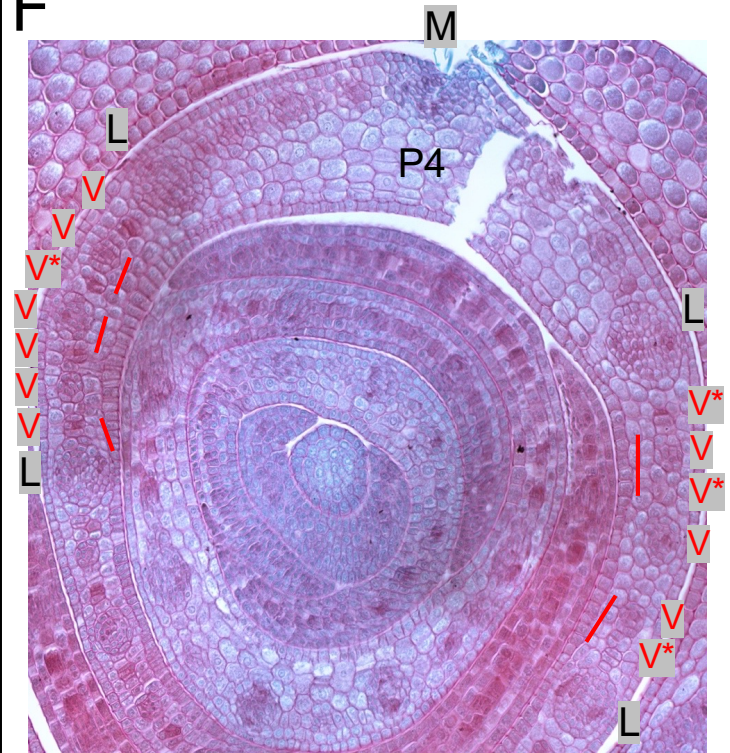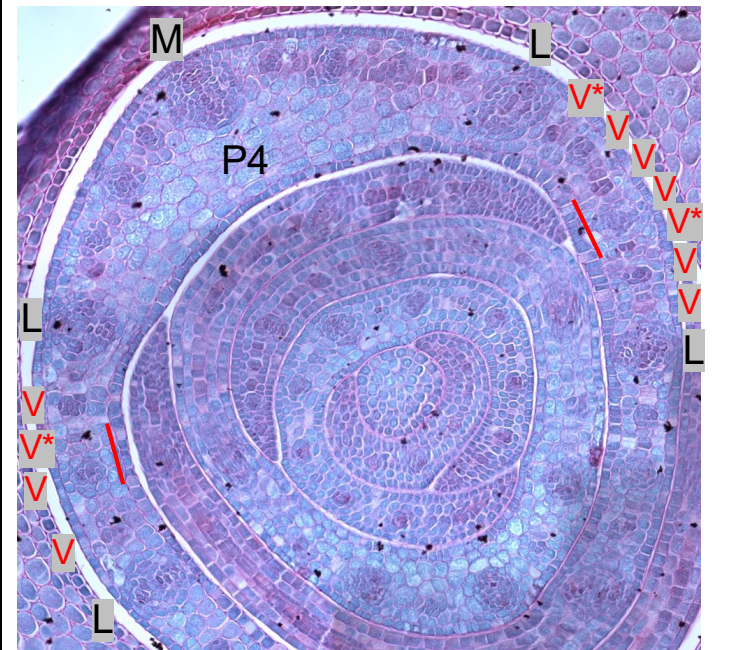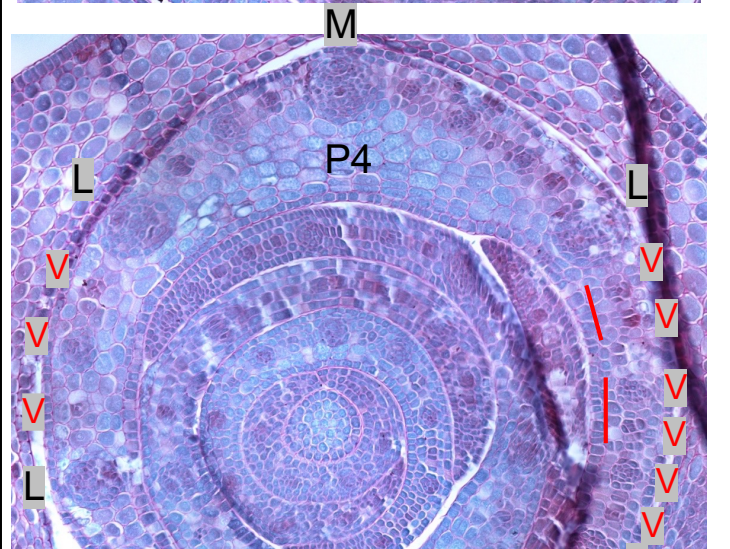*scr1;scr1h;nkd1;nkd2* (hom parent)

**Figure S10.** Leaf patterning defects are evident in mature embryos of maize. **A-C)** Cross sections of mature embryos of wild-type W22 (A), double *Zmscr1-m2;Zmscr1h-m1* mutants (B) and double *Zmnkd1-Ds;Zmnkd2-Ds* mutants (C). Double *Zmscr1-m2;Zmscr1h-m1* mutants were derived from selfed *Zmscr1-m2/+;Zmscr1h-m1* parents whereas double *Zmnkd1-Ds;Zmnkd2-Ds* mutants were derived from selfed double mutant parents. Three embryos of each genotype are shown. The midvein (M), lateral (L) and developing intermediate (V or V\* if very early in development) veins are indicated in the oldest leaf primordium, which in most cases is at plastochron (P) 4. Instances of fused veins are indicated by red lines. **D)** Cross sections of the double *Zmnkd1-Ds;Zmnkd2-Ds* mutant embryos in (C) shown at lower magnification to illustrate coleoptile phenotypes. Arrows point to vascular centres in the coleoptile. **E, F)** Quadruple mutants derived from selfed *Zmscr1-m2/+;Zmscr1h-m1;Zmnkd1-Ds/+;Zmnkd2-Ds/+* (*nkd* heterozygous) (E) or selfed *Zmscr1-m2/+;Zmscr1h-m1;Zmnkd1-Ds;Zmnkd2-Ds* (*nkd* homozygous) (F) parents. Labels as for (A-C).
